# Supplementary material
Source: HighWire-hosted journal article supplement (https://erj.ersjournals.com/content/58/3/2100811)

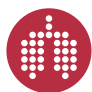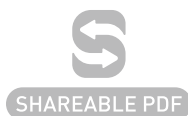

# COVID-19 pneumonia and the pulmonary vasculature: a marriage made in hell

Peter M. George<sup>1,2</sup> and Sujal R. Desai<sup>2,3</sup>

<sup>1</sup>The Interstitial Lung Disease Unit, Royal Brompton and Harefield Hospitals, London, UK. <sup>2</sup>National Heart and Lung Institute, Imperial College London, London, UK. <sup>3</sup>Dept of Radiology, Royal Brompton and Harefield Hospitals, London, UK.

Corresponding author: Peter M. George ([p.george@rbht.nhs.uk](mailto:p.george@rbht.nhs.uk))

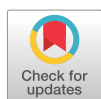

Shareable abstract (@ERSpublications)

**Quantitative CT of the pulmonary vasculature is potentially important in COVID-19 associated pneumonia** <https://bit.ly/3vUTTRM>

**Cite this article as:** George PM, Desai SR. COVID-19 pneumonia and the pulmonary vasculature: a marriage made in hell. *Eur Respir J* 2021; 58: 2100811 [DOI: 10.1183/13993003.00811-2021].

This single-page version can be shared freely online.

Copyright ©The authors 2021.

This version is distributed under the terms of the Creative Commons Attribution Non-Commercial Licence 4.0. For commercial reproduction rights and permissions contact [permissions@ersnet.org](mailto:permissions@ersnet.org)

Received: 18 March 2021  
Accepted: 22 March 2021

Automated analysis of medical images is not new [1–3]. Researchers in the respiratory sciences and, particularly, the field of interstitial lung diseases, have long enthused about the potential for computers to analyse medical images thereby revealing “signals” hitherto invisible to the human eye: an enthusiasm only enhanced by recent developments in machine learning and artificial intelligence [4–6]. By leveraging the central importance of computed tomography (CT) scanning for diagnosis, treatment decisions and prognostication, a key aim is to identify imaging biomarkers to more accurately phenotype disease and, in so doing, move a step closer to truly patient-centric medicine. Another goal is to apply novel imaging analyses to pathogenesis, disease “behaviour” and prognostication in the hope that this might unlock new therapeutic approaches. Given the digital nature of the data and the potentially myriad imaging patterns, frequently compounded by patient, therapeutic and disease-based factors, lung imaging is ideally suited to more sophisticated analytic approaches.

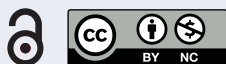

Supplement: inline-supplementary-material-1 [file inline-supplementary-material-1.pdf]
